# Supplementary material for: [11C]Methionine and [11C]PBR28 as PET Imaging Tracers to Differentiate Metastatic Tumor Recurrence or Radiation Necrosis
Source: PubMed Central journal article supplement — Mol Imaging. 2020 Nov 4;19:1536012120968669. doi: 10.1177/1536012120968669 (PMC7649862; doi:10.1177/1536012120968669), 2020-11-04
Supplement: PET_Manuscript.2020.09.21.Supplemental.pdf [file PET_Manuscript.2020.09.21.Supplemental.pdf]

## Supplemental Data

### Title

[<sup>11</sup>C]Methionine and [<sup>11</sup>C]PBR28 as PET imaging tracers to differentiate metastatic tumor recurrence or radiation necrosis

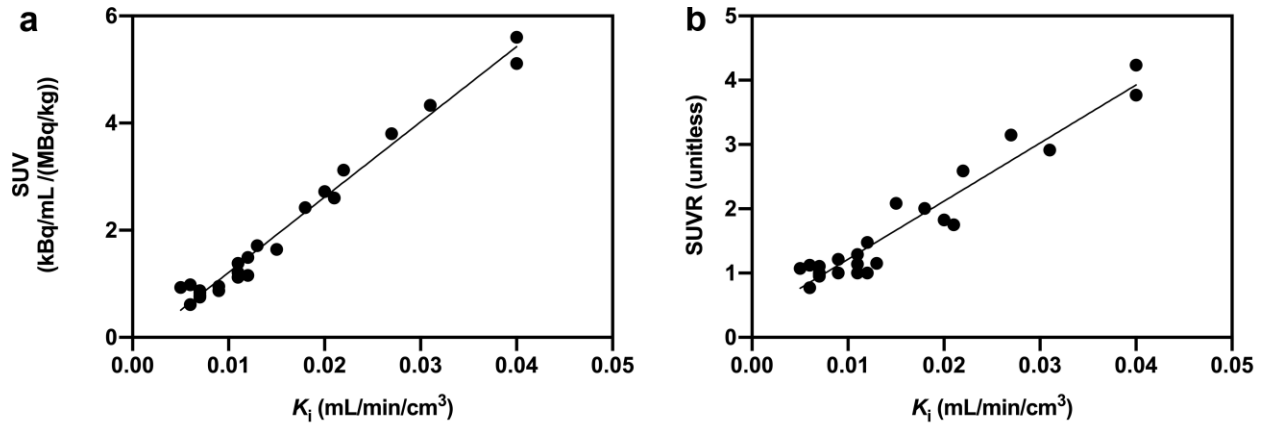

**Figure S1. [<sup>11</sup>C]MET quantification.** a, Correlation between [<sup>11</sup>C]MET SUV and  $K_i$  values ( $r^2=0.981$ ). b, Correlation between [<sup>11</sup>C]MET SUVR and  $K_i$  values ( $r^2=0.935$ ).

| Patient ID | Tumor Location | Visual Inspection | SUV  | SUVR | $K_i$ | Relative $K_i$ | Final Score |
|------------|----------------|-------------------|------|------|-------|----------------|-------------|
| 1          | right frontal  | ++                | 3.8  | 3.15 | 0.027 | 2.57           | ***         |
| 2          | right frontal  | ++                | 4.33 | 2.92 | 0.031 | 2.62           | ***         |
| 3          | right frontal  | -                 | 0.98 | 1.12 | 0.006 | 0.67           | -           |
| 4          | left frontal   | +                 | 1.16 | 1.48 | 0.012 | 1.82           | *           |
|            | right parietal | -                 | 0.75 | 0.95 | 0.007 | 1.06           | -           |
| 5          | right frontal  | -                 | 1.33 | 1.42 |       |                | -           |
|            | left frontal   | -                 | 1.21 | 1.29 |       |                | -           |

|               |           |      |      |       |      |
|---------------|-----------|------|------|-------|------|
| Normal Range: | Threshold | 2.82 | 1.51 | 0.021 | 2.00 |
|               | Mean      | 1.18 | 1.19 | 0.010 | 1.20 |
|               | SD        | 0.27 | 0.05 | 0.002 | 0.13 |
|               | RSD       | 23%  | 4%   | 17%   | 11%  |

++ large hotspot visible on SUV images

+ small hotspot visible on SUV images (i.e., small compared to gadolinium-enhanced area)

\*\*\* quantitatively above threshold

\* not quantitatively above threshold, and small hotspot visible on SUV images

**Table S1. [<sup>11</sup>C]MET PET results.** [<sup>11</sup>C]MET positivity was detected by visual inspection and by SUV score. The uptake rate constant  $K_i$  was estimated using Patlak analysis with arterial blood sampling. Patient 5 did not have arterial sampling performed due to concurrent anti-coagulation. Patients 1 and 2 were deemed [<sup>11</sup>C]MET positive based on a final score above the relative  $K_i$  threshold of 2.00. Patient 4 had a lesions with visually detectable [<sup>11</sup>C]MET positivity, but the final relative  $K_i$  was below threshold.

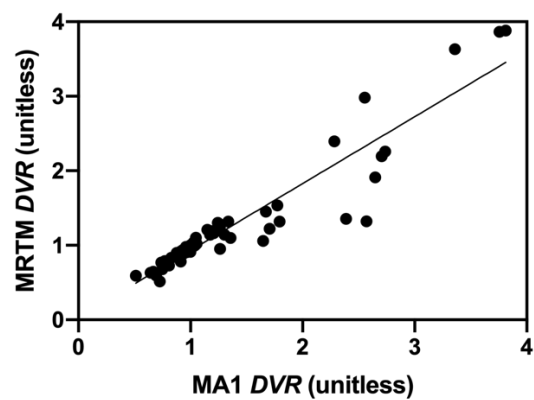

**Figure S2. [<sup>11</sup>C]PBR28 DVR quantification.** Correlation between [<sup>11</sup>C]PBR28 volume of distribution ratio (*DVR*) values estimated using MA1 and MRTM ( $r^2=0.870$ ). The reference region used to compute *DVR* values was the contralateral, normal cortex.

| Patient ID | Tumor Location | Visual Inspection | DVR  | Final Score |
|------------|----------------|-------------------|------|-------------|
| 1          | right frontal  | ++                | 3.36 | ***         |
| 2          | right frontal  | ++                | 2.65 | ***         |
| 3          | right frontal  | -                 | 1.26 | -           |
| 4          | left frontal   | +                 | 1.30 | *           |
|            | right parietal | ++                | 1.71 | **          |
| 5          | right frontal  | ++                | 6.80 | ***         |
|            | left frontal   | ++                | 5.97 | ***         |

|               |           |      |
|---------------|-----------|------|
| Normal Range: | Threshold | 1.77 |
|               | Mean      | 1.05 |
|               | SD        | 0.12 |
|               | RSD       | 11%  |

++ large hotspot visible on DVR images

+ small hotspot visible on DVR images (i.e., small compared to gadolinium-enhanced area)

\*\*\* quantitatively above threshold

\*\* not quantitatively above threshold, but large hotspot visible on DVR images

\* not quantitatively above threshold, and small hotspot visible on DVR images

**Table S2. [<sup>11</sup>C]PBR28 PET results.** For [<sup>11</sup>C]PBR28, DVR above a threshold of 1.77 was deemed positive. Patients 1, 2, and 5 were positive by [<sup>11</sup>C]PBR28 PET. Patient 4 had two tumors which were visually detected but had DVR scores <1.77.
